# Supplementary material
Source: PubMed Central journal article supplement (PMC6562004)

## Supplemental Data

### Lessons Learned from Large-Scale, First-Tier

### Clinical Exome Sequencing in a

### Highly Consanguineous Population

Dorota Monies, Mohammed Abouelhoda, Mirna Assoum, Nabil Moghrabi, Rafiullah Rafiullah, Naif Almontashiri, Mohammed Alowain, Hamad Alzaidan, Moeen Alsayed, Shazia Subhani, Edward Cupler, Maha Faden, Amal Alhashem, Alya Qari, Aziza Chedrawi, Hisham Aldhalaan, Wesam Kurdi, Sameena Khan, Zuhair Rahbeeni, Maha Alotaibi, Ewa Goljan, Hadeel Elbardisy, Mohamed ElKalioby, Zeeshan Shah, Hibah Alruwaili, Amal Jaafar, Ranad Albar, Asma Akilan, Hamsa Tayeb, Asma Tahir, Mohammed Fawzy, Mohammed Nasr, Shaza Makki, Abdullah Alfaifi, Hanna Akleh, Suad Yamani, Dalal Bubshait, Mohammed Mahnashi, Talal Basha, Afaf Alsagheir, Musad Abu Khaled, Khalid Alsaleem, Maisoon Almugbel, Manal Badawi, Fahad Bashiri, Saeed Bohlega, Raashida Sulaiman, Ehab Tous, Syed Ahmed, Talal Algoufi, Hamoud Al-Mousa, Emadia Alaki, Susan Alhumaidi, Malak Althagafi, Hadeel Alghamdi, Malak Alghamdi, Ahmed Sahly, Shapar Nahrir, Ali Al-Ahmari, Hisham Alkuraya, Ali Almehaidib, Mohammed Abanemai, Fahad Alsohaibaini, Bandar Alsaud, Rand Arnaout, Ghada M.H. Abdel-Salam, Hasan Aldhekri, Suzan AlKhater, Khalid Alqadi, Essam Alsabban, Turki Alshareef, Khalid Awartani, Hanaa Banjar, Nada Alsahan, Ibraheem Abosoudah, Abdullah Alashwal, Wajeeh Aldekhail, Sami Alhajjar, Sulaiman Al-Mayouf, Abdulaziz Alsemari, Walaa Alshuaibi, Saeed Altala, Abdulhadi Altalhi, Salah Baz, Muddathir Hamad, Tariq Abalkhail, Badi Alenazi, Alya Alkaff, Fahad Almohareb, Fuad Al Mutairi, Mona Alsaleh, Abdullah Alsonbul, Somaya Alzelaye, Shakir Bahzad, Abdulaziz Bin Manee, Ola Jarrad, Neama Meriki, Bassem Albeirouti, Amal Alqasmi, Mohammed AlBalwi, Nawal Makhseed, Saeed Hassan, Isam Salih, Mustafa A. Salih, Marwan Shaheen, Saadeh Sermin, Shamsad Shahrukh, Shahrukh Hashmi, Ayman Shawli, Ameen Tajuddin, Abdullah Tamim, Ahmed Alnahari, Ibrahim Ghemlas, Maged Hussein, Sami Wali, Hatem Murad, Brian F. Meyer, and Fowzan S. Alkuraya

### Figure S1. Flash WES protocol.

Summary of the steps and timing of FLASH WES resulting in an interval of 26 hours between consent and delivery of a provisional clinical report. Rapid DNA extraction was performed using the PureLink Genomic DNA kit (Thermo Fisher, Carlsbad, CA, USA) as recommended by manufacturer ([https://www.thermofisher.com/document-connect/document-connect.html?url=https://assets.thermofisher.com/TFS-Assets/LSG/manuals/purelink\\_genomic\\_man.pdf](https://www.thermofisher.com/document-connect/document-connect.html?url=https://assets.thermofisher.com/TFS-Assets/LSG/manuals/purelink_genomic_man.pdf)). Library preparation, emulsion PCR, enrichment and sequencing were performed using the Ion Torrent AmpliSeq Whole Exome Sequencing protocol (<https://www.thermofisher.com/sa/en/home/life-science/sequencing/dna-sequencing/exome-sequencing/exome-sequencing-ion-torrent-next-generation-sequencing.html>). Sequence alignment, indexing of the reference genome (hg19), variant calling and annotation used a pipeline based on BWA, Samtools, GATK (<https://software.broadinstitute.org/gatk/>) and Annovar, respectively. Essentially, variants were annotated using a combination of public knowledge databases available from the Annovar package and in-house databases which included collections of previously published Saudi disease causing variants.

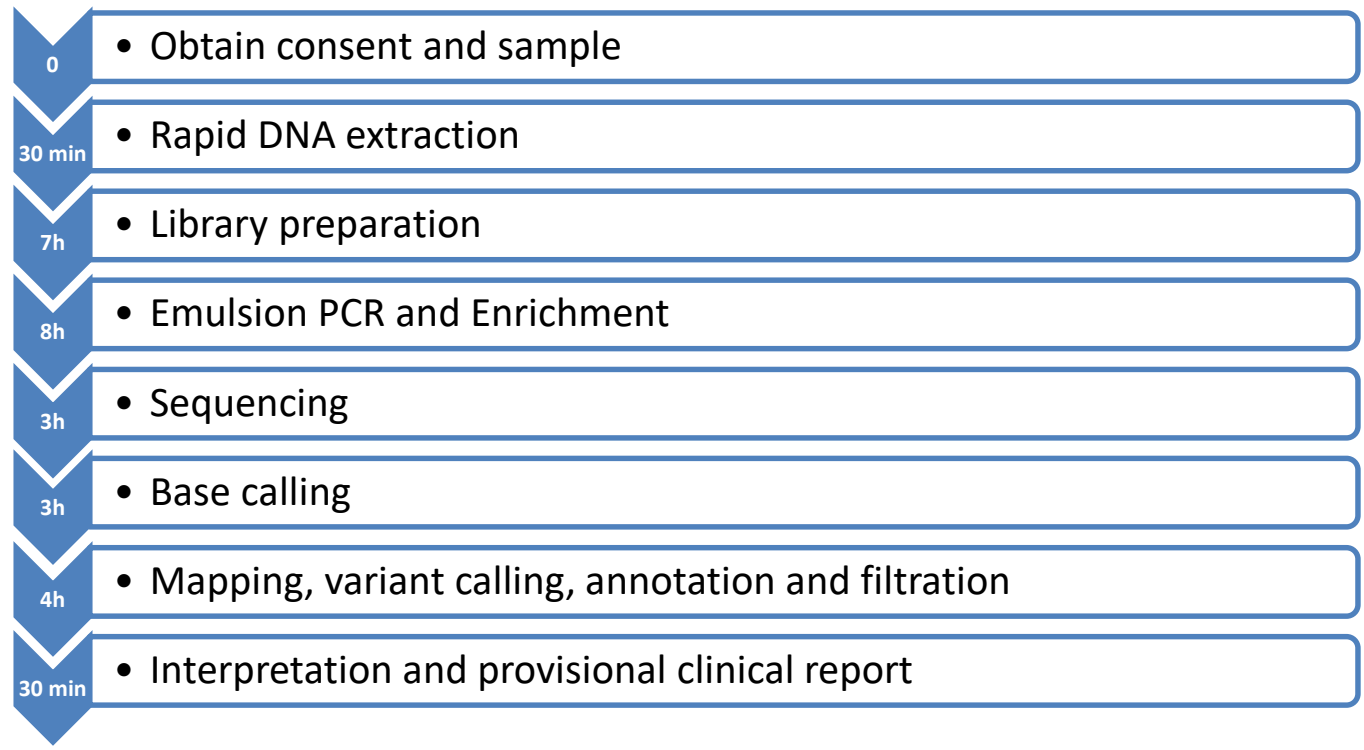

**Figure S2. Carrier status for KSM (known Saudi mutations).**

A) Distribution of KSM carrier status in the cohort. B) Distribution of shared KSM carrier status among couples.

**A) KSM carrier distribution**

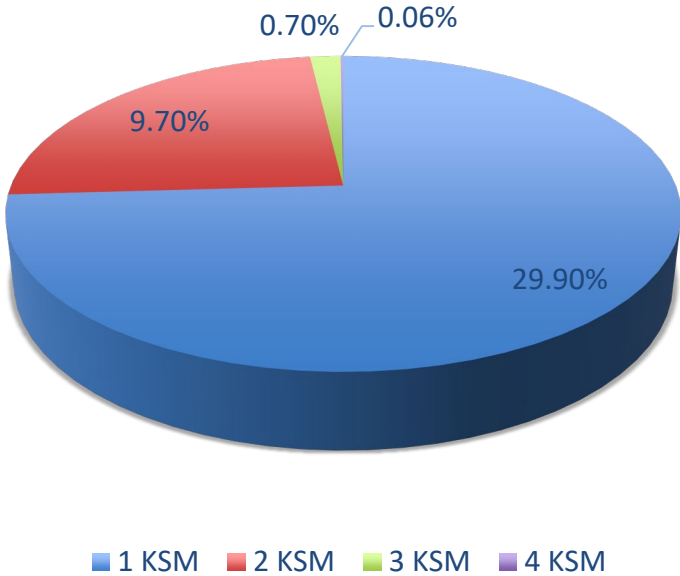

**B) Distribution of parents sharing KSM excluding alleles causing disease in index cases**

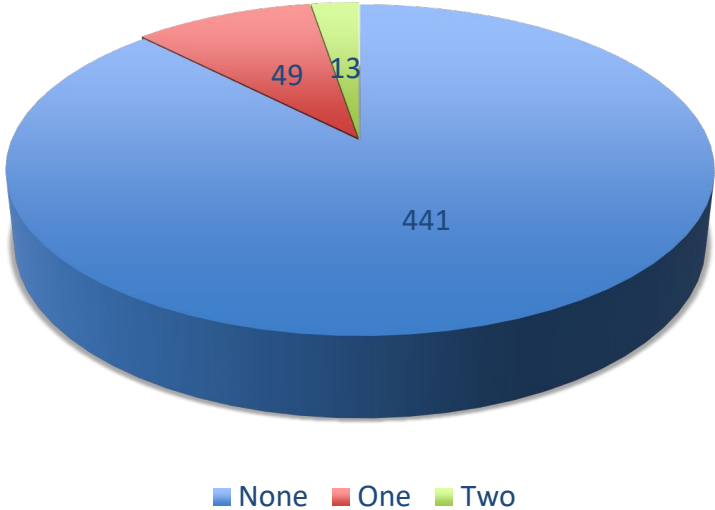

Supplement: mmc1.pdf [file mmc1.pdf]
