# Supplementary material
Source: PubMed Central journal article supplement (PMC6562004)
Supplement: mmc3.pdf [file mmc3.pdf]

Table S2. List of Previously Reported Candidate Genes whose Candidacy Is Further Supported by Findings in this Cohort

| ID      | Gene          | Variant(s)                                                 | Zygoty         | Original Report | Original Phenotype                                                                            | Observed Phenotype                                                                                            | Phenotypic Comparison                                                                                              |
|---------|---------------|------------------------------------------------------------|----------------|-----------------|-----------------------------------------------------------------------------------------------|---------------------------------------------------------------------------------------------------------------|--------------------------------------------------------------------------------------------------------------------|
| 17-5507 | <i>ACAT2</i>  | GenBank: NM_001303253.1:c.35A>G:p.Asn12Ser                 | Het            | PMID: 6150136   | Developmental delay, hypotonia, ataxic movements, and chorea movements                        | Microcephaly, GDD, heterotopia, hypomyelination, hypertonia, spasticity, and lactic acidemia                  | Similar                                                                                                            |
| 17-1447 | <i>ACTL6B</i> | GenBank: NM_016188.4:c.999T>A:p.Cys333Ter                  | Hom            | PMID: 26539891  | Severe intellectual disability, microcephaly, seizures, and some autistic behavioral patterns | Gross motor delay, basal ganglia abnormalities, hypertonia, exaggerated startle, and gastroesophageal reflux  | Phenotypic expansion                                                                                               |
| 17-0962 | <i>AKAP6</i>  | GenBank: NM_004274.4:c.1874A>T:p.Tyr625Phe                 | Het            | PMID: 28600779  | NSID                                                                                          | GDD, anemia, ?hereditary spherocytosis, and ?Gilbert disease                                                  | N/A (This is a multilocus phenotype; see <a href="#">Table S1</a> for a full list of variants in this individual.) |
| 17-0422 | <i>ALG9</i>   | GenBank: NM_001077690.1:c.430T>C:p.Cys144Arg               | Hom            | PMID: 25966638  | Gillessen-Kaesbach-Nishimura syndrome                                                         | Cardiomegaly, pericardial effusion, a thick nuchal fold, oligohydramnios, hydronephrosis, and a small bladder | Similar                                                                                                            |
| 18-1233 | <i>ARF1</i>   | GenBank: NM_001024226.1:c.379A>G:p.Lys127Glu               | <i>De novo</i> | PMID: 28868155  | Periventricular heterotopia                                                                   | Periventricular heterotopia, microcephaly, failure to thrive, short stature, and dysmorphic features          | Phenotypic expansion                                                                                               |
| 17-6686 | <i>ARMC9</i>  | GenBank: NM_025139.5:c.51+5G>T                             | Hom            | PMID: 28625504  | Joubert syndrome                                                                              | Joubert syndrome                                                                                              | Similar                                                                                                            |
| 17-9070 | <i>ATAD3A</i> | GenBank: NM_018188.4:c.1410+1G>A:                          | Hom            | PMID: 27640307  | Autosomal-recessive Harel-Yoon syndrome                                                       | Intrauterine fetal death with polyhydramnios                                                                  | Phenotypic expansion                                                                                               |
| 17-4230 | <i>ATNI</i>   | GenBank: NM_001007026.1:c.1503_1508del::p.Gln501_Gln502del | <i>De novo</i> | PMID: 27431290  | <i>De novo</i> ATNI-related GDD                                                               | GDD                                                                                                           | Similar                                                                                                            |

|             |               |                                                          |                |                   |                                                                                                                                                                                       |                                                                                                                                                              |                                         |
|-------------|---------------|----------------------------------------------------------|----------------|-------------------|---------------------------------------------------------------------------------------------------------------------------------------------------------------------------------------|--------------------------------------------------------------------------------------------------------------------------------------------------------------|-----------------------------------------|
| 17-6079     | <i>ATP11C</i> | GenBank:<br>NM_173694.4:c.1675+2T>C:                     | Hemi           | PMID:<br>26944472 | Hemolytic anemia                                                                                                                                                                      | Fetus with hydrops fetalis                                                                                                                                   | Phenotypic expansion                    |
| 17-5302     | <i>ATP2B3</i> | GenBank:<br>NM_001001344.2:c.3542delA:p.Gln1181ArgfsTer6 | Hemi           | PMID:<br>22912398 | X-linked spinocerebellar ataxia                                                                                                                                                       | Failure to thrive, microcephaly, and developmental regression                                                                                                | Phenotypic expansion                    |
| REQ 18-1700 | <i>BAAT</i>   | GenBank:<br>NM_001127610.1:c.2T>A:p.?                    | Hom            | PMID:<br>12704386 | Cholestasis (?digenic)                                                                                                                                                                | 2-month-old infant with cholestatic liver failure                                                                                                            | Similar (different inheritance pattern) |
| 17-5831     | <i>CDK10</i>  | GenBank:<br>NM_052988.4:c.139delG:p.Glu47ArgfsTer21      | Hom            | PMID:<br>28886341 | Severe growth retardation, spine malformations, and developmental delays                                                                                                              | Atrial septal defect, gross motor delay, speech delay, hypertelorism of the eye, a broad nose, hypotonia, vesicoureteral reflux, and gastroesophageal reflux | Phenotypic expansion                    |
| 16-2564     | <i>CHD8</i>   | GenBank:<br>NM_001170629.1:c.4984C>T:p.Arg1662Ter        | <i>De novo</i> | PMID:<br>22495309 | ASD                                                                                                                                                                                   | ASD                                                                                                                                                          | Similar                                 |
| 17-6317     | <i>CLDN10</i> | GenBank:<br>NM_001160100.1:c.590delC:p.Pro197LeufsTer21  | Hom            | PMID:<br>28771254 | HELIX syndrome                                                                                                                                                                        | Dry skin, no saliva, no tears, and no sweating                                                                                                               | Similar                                 |
| REQ 18-1383 | <i>CLHC1</i>  | GenBank:<br>NM_001135598.1:c.610C>T:p.Arg204Ter          | Hom            | PMID:<br>25558065 | Myopathy                                                                                                                                                                              | Myopathy                                                                                                                                                     | Similar                                 |
| 17-6687     | <i>CNTN5</i>  | GenBank:<br>NM_014361.3:c.1300-1G>A                      | Het            | PMID:<br>28600779 | Fine motor delay, speech delay, intellectual disability, learning disability, developmental regression, hypertonia, seizures tonic, spasticity, cerebellar atrophy, GDD, and epilepsy | Overgrowth, macrocephaly, speech delay, learning disability, developmental regression, ataxia, seizures, periventricular leukomalacia, and obesity           | Similar                                 |

|         |                |                                                                     |     |                   |                                                                                                                                   |                                                                                                |                      |
|---------|----------------|---------------------------------------------------------------------|-----|-------------------|-----------------------------------------------------------------------------------------------------------------------------------|------------------------------------------------------------------------------------------------|----------------------|
| 18-0676 | <i>CPNE6</i>   | GenBank:<br>NM_006032.3:c.546C>G:p.Asn182Lys                        | Hom | PMID:<br>27431290 | Neurodegeneration, strabismus, nystagmus, dysarthria, muscle weakness, hyporeflexia, and abnormality of the cerebral white matter | Neonatal seizures, microcephaly, GDD, failure to thrive, spasticity, dystonic movements        | Similar              |
| 17-5982 | <i>CSNK1G1</i> | GenBank:<br>NM_022048.3:c.1099C>T: p.Arg367Ter                      | Het | PMID:<br>24463883 | Severe early-onset epilepsy                                                                                                       | Ventricular septal defect, learning disability, epilepsy, a fatty liver, and gallbladder stone | Phenotypic expansion |
| 17-6285 | <i>DDX41</i>   | GenBank:<br>NM_016222.3:c.47_48delTG:p.Val16AlafsTer12              | Het | PMID:<br>25920683 | Familial susceptibility to myeloproliferative and/or lymphoproliferative neoplasms                                                | Recurrent pancytopenia and histiocytic lymphohistiocytosis                                     | Similar              |
| 18-0998 | <i>DMKN</i>    | GenBank:<br>NM_001126057.2:c.852_853dupCA:p.Ser285ThrfsTer74        | Hom | PMID:<br>28600779 | Ventricular septal defect, speech delay, learning disability, cleft lip and/or palate, skin laxity, joint laxity                  | Congenital heart disease and a sister who died of severe congenital heart disease              | Similar              |
| 17-4852 | <i>DNAJC17</i> | GenBank:<br>NM_018163.3:c.681G>A: r. 601_681del; p.Tyr201_Ala227del | Hom | PMID:<br>26355662 | Retinitis pigmentosa with immunodeficiency                                                                                        | Retinitis pigmentosa with immunodeficiency                                                     | Similar              |
| 17-2105 | <i>DRD5</i>    | GenBank:<br>NM_000798.4:c.33C>A:p.Tyr11Ter                          | Het | PMID:<br>11459908 | Dystonia                                                                                                                          | Dystonia                                                                                       | Similar              |
| 17-3125 | <i>GPR88</i>   | GenBank:<br>NM_022049.2:c.299_300insC:p.Glu100AspfsTer288           | Hom | PMID:<br>27123486 | Chorea, speech delay, and learning disabilities                                                                                   | Dystonia, dysarthria, white matter lesions, and is non-responsive to L-dopa                    | Similar              |

|         |                 |                                                          |                                 |                   |                                                                       |                                                                                                                                                                           |                      |
|---------|-----------------|----------------------------------------------------------|---------------------------------|-------------------|-----------------------------------------------------------------------|---------------------------------------------------------------------------------------------------------------------------------------------------------------------------|----------------------|
| 17-5371 | <i>GRM1</i>     | GenBank:<br>NM_001278064.1:c.1568dupT:p.Cys524ValfsTer3  | Hom                             | PMID:<br>22901947 | Spinocerebellar ataxia and autosomal recessive 13                     | GDD                                                                                                                                                                       | Similar              |
| 17-6787 | <i>HIST1HIE</i> | GenBank:<br>NM_005321.2:c.441dupC:p.Lys148GlnfsTer48     | Het                             | PMID:<br>28475857 | Intellectual disability and variable overgrowth                       | Microcephaly, intellectual disability, seizure, brain atrophy, scoliosis, hip dislocation, dysmorphic, and hyperpigmented lesions in the trunk starting at 2 years of age | Similar              |
| 17-3747 | <i>HIVEPI</i>   | GenBank:<br>NM_002114.4:c.4111A>G:p.Ile1371Val           | <i>De novo</i>                  | PMID:<br>27003583 | Developmental delay, intellectual disability, and dysmorphic features | Failure to thrive, microcephaly, hypotonia, contractures, and club foot                                                                                                   | Similar              |
| 18-2419 | <i>KCND2</i>    | GenBank:<br>NM_012281.3:c.1208C>G:p.Pro403Arg            | <i>De novo</i>                  | PMID:<br>24501278 | ASD and seizures                                                      | Seizure disorder, intellectual disability, muscle weakness, and hypotonia                                                                                                 | Similar              |
| 17-3418 | <i>KDM5A</i>    | GenBank:<br>NM_001042603.2:c.1429T>G:p.Phe477Val         | Hom                             | PMID:<br>21937992 | Intellectual disability                                               | Developmental delay and dysmorphic features                                                                                                                               | Similar              |
| 17-8170 | <i>LACC1</i>    | GenBank:<br>NM_001128303.2:c.850T>C:p.Cys284Arg          | Hom                             | PMID:<br>25147203 | Crohn disease with arthropathy                                        | Arthropathy                                                                                                                                                               | Similar              |
| 18-1546 | <i>LARS</i>     | GenBank:<br>NM_020117.10:c.3325+1delG:                   | Hom                             | PMID:<br>22607940 | Infantile liver failure                                               | Epileptic encephalopathy and GDD                                                                                                                                          | Phenotypic expansion |
| 17-2109 | <i>LGI4</i>     | GenBank:<br>NM_139284.2:c.834delG:p.Ser279AlafsTer191    | <sup>a</sup> Het (both parents) | PMID:<br>28318499 | Arthrogryposis multiplex congenita, neurogenic, with myelin defect    | History of multiple neonatal deaths                                                                                                                                       | Similar              |
| 17-5632 | <i>MAG</i>      | GenBank:<br>NM_001199216.1:c.720C>A:p.Ser240Arg          | Hom                             | PMID:<br>27606346 | Intellectual disability and ataxia                                    | Intellectual disability and ataxia                                                                                                                                        | Similar              |
| 17-3591 | <i>MBOAT7</i>   | GenBank:<br>NM_001146056.2:c.604G>A:p.Gly202Ser          | Hom                             | PMID:<br>27616480 | Mental retardation and autosomal recessive 57                         | Speech delay, ataxia, and bilateral globus pallidus involvement                                                                                                           | Phenotypic expansion |
| 17-6540 | <i>MBOAT7</i>   | GenBank:<br>NM_001146056.2:c.1000delT:p.Tyr334MetfsTer41 | Hom                             | PMID:<br>27616480 | Mental retardation and autosomal recessive 57                         | GDD, autistic features, and failure to thrive                                                                                                                             | Similar              |

|         |                 |                                                         |                |                   |                                                                                    |                                                                                                                                                                                  |                      |
|---------|-----------------|---------------------------------------------------------|----------------|-------------------|------------------------------------------------------------------------------------|----------------------------------------------------------------------------------------------------------------------------------------------------------------------------------|----------------------|
| 17-1170 | <i>MCID AS</i>  | GenBank:<br>NM_001190787.1:c.717+2T>G:                  | Hom            | PMID:<br>25048963 | Primary ciliary dyskinesia                                                         | Primary ciliary dyskinesia                                                                                                                                                       | Similar              |
| 17-2106 | <i>NCKA PI</i>  | GenBank:<br>NM_013436.4:c.742-3A>C                      | <i>De novo</i> | PMID:<br>28940097 | Nonsyndromic intellectual disability                                               | Intellectual disability and epilepsy                                                                                                                                             | Phenotypic expansion |
| 17-2505 | <i>NDUF B10</i> | GenBank:<br>NM_004548.2:c.373_375delCAG:p.Gln125del     | Hom            | PMID:<br>28040730 | Fatal infantile lactic acidosis and cardiomyopathy                                 | Non-immune hydrops fetalis, died after birth                                                                                                                                     | Distinct phenotype   |
| 17-1765 | <i>PGAP 3</i>   | GenBank:<br>NM_001291726.1:c.697C>T:p.His233Tyr         | Hom            | PMID:<br>29620724 | Toriello-Carey syndrome                                                            | Failure to thrive, fine motor delay, gross motor delay, speech delay, intellectual disability, learning disability, hypotonia, and a brother with cerebellar hypoplasia          | Similar              |
| 17-2720 | <i>PGAP 3</i>   | GenBank:<br>NM_001291726.1:c.697C>T:p.His233Tyr         | Hom            | PMID:<br>29620724 | Toriello-Carey syndrome                                                            | Failure to thrive, fine motor delay, gross motor delay, intellectual disability, speech delay, cleft lip, blindness, hearing loss, tonic seizures, muscle weakness, constipation | Similar              |
| 17-0806 | <i>PIK3C A</i>  | GenBank:<br>NM_006218.3:c.3103G>A:p.Ala1035Thr          | Het            | PMID:<br>23246288 | Cowden syndrome                                                                    | Macrocephaly, multiple cafe au lait spots, GDD, speech and cognitive delay, autistic features, periventricular white matter changes by MRI, and epilepsy                         | Similar              |
| 17-5492 | <i>PITX3</i>    | GenBank:<br>NM_005029.3:c.640_656del:p.Ala214ArgfsTer42 | Hom            | PMID:<br>21836522 | Autosomal-recessive, severe form of anterior segment dysgenesis and microphthalmia | Gross motor delay, speech delay, cataract, blindness, and spasticity                                                                                                             | Similar              |
| 18-0885 | <i>PPP1 R21</i> | GenBank:<br>NM_001135629.2:c.427C>T:p.Arg143Ter         | Hom            | PMID:<br>28940097 | Intellectual disability, dysmorphic facies, and hypotonia                          | Intellectual disability, dysmorphic facies, and hypotonia                                                                                                                        | Similar              |
| 17-1250 | <i>PPP2 R5C</i> | GenBank:<br>NM_002719.3:c.398A>G:p.His133Arg            | <i>De novo</i> | PMID:<br>25972378 | Overgrowth                                                                         | Macrocephaly, demyelination, developmental delay, and hypotonia that improved with time                                                                                          | Similar              |
| 18-2160 | <i>PPP2 R5C</i> | GenBank:<br>NM_178586.2:c.1343A>G:p.Lys448Arg           | Het            | PMID:<br>25972378 | Overgrowth                                                                         | Overgrowth                                                                                                                                                                       | Similar              |

|                    |                           |                                                                  |                |                       |                                                                                                       |                                                                                                                                                                                                                                                                                                  |                                                         |
|--------------------|---------------------------|------------------------------------------------------------------|----------------|-----------------------|-------------------------------------------------------------------------------------------------------|--------------------------------------------------------------------------------------------------------------------------------------------------------------------------------------------------------------------------------------------------------------------------------------------------|---------------------------------------------------------|
| REQ<br>18-<br>1959 | <i>PRKD</i><br><i>I</i>   | GenBank:<br>NM_002742.2:c.2554<br>G>T:p.Glu852Ter                | Hom            | PMID:<br>2571311<br>0 | Truncus<br>arteriosus                                                                                 | 8-week-old boy with severe complex<br>congenital heart disease (pulmonary atresia,<br>ventricular septal defect, major<br>aortopulmonary collateral artery, patent ductus<br>arteriosus, and hypertrophic cardiomyopathy;<br>on prostaglandin with biventricular<br>hypertrophic cardiomyopathy) | Phenotypic expansion                                    |
| 16-<br>2870        | <i>PUF6</i><br><i>O</i>   | GenBank:<br>NM_078480.2:c.24+1<br>G>C                            | Het            | PMID:<br>2780495<br>8 | A recognizable<br>syndrome with<br>intellectual<br>disability, heart<br>defects, and<br>short stature | Dysmorphic baby with multiple congenital<br>anomalies (cleft lip and dysplastic vertebrae)                                                                                                                                                                                                       | Similar                                                 |
| 17-<br>1020        | <i>QRFP</i><br><i>R</i>   | GenBank:<br>NM_198179.2:c.373C<br>>T:p.Gln125Ter                 | <i>De novo</i> | PMID:<br>2743129<br>0 | Intellectual<br>disability                                                                            | Failure to thrive, growth retardation,<br>microcephaly, fine motor delay, gross motor<br>delay, speech delay, intellectual disability,<br>nystagmus, spasticity, and PMLD?                                                                                                                       | Similar (different inheritance<br>pattern)              |
| 17-<br>2764        | <i>QRSL</i><br><i>I</i>   | GenBank:<br>NM_018292.4:c.1042<br>+3A>G:                         | Hom            | PMID:<br>2674149<br>2 | Childhood-<br>onset<br>mitochondrial<br>respiratory<br>chain complex<br>deficiency                    | Repeated episodes of encephalopathy with<br>muscle weakness and abnormal basal ganglia<br>on brain MRI                                                                                                                                                                                           | Similar                                                 |
| 17-<br>1228        | <i>RAC2</i>               | GenBank:<br>NM_002872.4:c.484C<br>>T:p.Gln162Ter                 | Hom            | PMID:<br>2551208<br>1 | SCID                                                                                                  | Failure to thrive, hypogammaglobulinemia,<br>and bronchial asthma                                                                                                                                                                                                                                | Similar                                                 |
| 17-<br>5425        | <i>RPS6</i><br><i>KA6</i> | GenBank:<br>NM_014496.4:c.688G<br>>C:p.Ala230Pro                 | Hemi           | PMID:<br>1064443<br>0 | X-linked<br>intellectual<br>disability                                                                | GDD and hearing loss                                                                                                                                                                                                                                                                             | Similar                                                 |
| 17-<br>1913        | <i>SETD</i><br><i>IA</i>  | GenBank:<br>NM_014712.2:c.4812<br>+4A>G:                         | Het            | PMID:<br>2697495<br>0 | Severe<br>neurodevelopm<br>ental disorder                                                             | Intellectual disability and epilepsy                                                                                                                                                                                                                                                             | Similar                                                 |
| 17-<br>3382        | <i>SLC16</i><br><i>AI</i> | GenBank:<br>NM_001166496.1:c.1<br>079delC:p.Ala360Gly<br>fsTer19 | Hom            | PMID:<br>2539074<br>0 | Recurrent,<br>severe<br>ketoacidosis                                                                  | Developmental delay, frequent episodes of<br>acidosis and ketotic hypoglycemia, and<br>epilepsy                                                                                                                                                                                                  | Similar                                                 |
| 17-<br>4510        | <i>SLC16</i><br><i>AI</i> | GenBank:<br>NM_001166496.1:c.4<br>2_43insC:p.Asp15Arg<br>fsTer34 | Hom            | PMID:<br>2539074<br>0 | Recurrent,<br>severe<br>ketoacidosis                                                                  | Developmental delay, epilepsy, and ketosis                                                                                                                                                                                                                                                       | Phenotypic expansion                                    |
| 17-<br>4393        | <i>SLC4</i><br><i>A10</i> | GenBank:<br>NM_022058.3:c.2773<br>-2A>C                          | Hom            | PMID:<br>1841348<br>2 | Complex<br>partial epilepsy<br>and intellectual<br>disability                                         | Microcephaly, fine motor delay, gross motor<br>delay, speech delay, intellectual disability, and<br>hypotonia                                                                                                                                                                                    | Phenotypic expansion (different<br>inheritance pattern) |

|             |                          |                                                                |     |                |                                                          |                                                                                                                                                                             |                                                                                                                    |
|-------------|--------------------------|----------------------------------------------------------------|-----|----------------|----------------------------------------------------------|-----------------------------------------------------------------------------------------------------------------------------------------------------------------------------|--------------------------------------------------------------------------------------------------------------------|
| 17-6065     | <i>SLC9A1</i>            | GenBank: NM_003047.4:c.1273C>T:p.Arg425Cys                     | Hom | PMID: 25205112 | Lichtenstein-Knorr syndrome                              | GDD, severe cerebellar dysfunction, hearing loss, and cerebellar atrophy                                                                                                    | Similar                                                                                                            |
| REQ 18-1086 | <i>SMG9</i>              | GenBank: NM_019108.3:c.701+4A>G:                               | Hom | PMID: 27018474 | Heart and brain malformation syndrome                    | Microcephaly, gross motor delay, intellectual disability, atrial septal defect, abnormal imaging (periventricular leukomalacia), and asthma                                 | Similar                                                                                                            |
| REQ 18-2221 | <i>SPDL1</i>             | GenBank: NM_017785.4:c.668A>G:p.Tyr223Cys                      | Hom | PMID: 25558065 | Severe hydranencephaly nearly occupying the entire skull | Hydranencephaly and epilepsy                                                                                                                                                | Similar                                                                                                            |
| 17-6278     | <i>SPTBN4</i>            | GenBank: NM_020971.2:c.1665+2T>C:                              | Hom | PMID: 28540413 | Congenital myopathy, neuropathy, and central deafness    | Speech delay, intellectual disability, ataxia, seizures, and cerebral atrophy                                                                                               | Phenotypic expansion                                                                                               |
| 18-0605     | <i>STXBPI</i>            | GenBank: NM_001032221.3:c.1060T>C:p.Cys354Arg                  | Het | PMID: 21364700 | Non-epileptic intellectual disability                    | Intellectual disability and ASD                                                                                                                                             | Similar                                                                                                            |
| 17-0889     | <i>TBC1D32</i>           | GenBank: NM_152730.6:c.1372+1G>T:                              | Hom | PMID: 24285566 | OFD IX                                                   | Previous termination of 15/32 with holoprosencephaly, cyclops, cleft lip, ventricular septal defect, agenesis of the corpus callosum, club foot, and sandal gap (no sample) | Phenotypic expansion                                                                                               |
| 17-4280     | <i>TMEM132E; IL12RB2</i> | GenBank: NM_001304438.1:c.1483-2A>G; NM_001258216.1:c.364+1G>A | Hom | PMID: 25331638 | Hearing loss                                             | Nystagmus, high arch palate, contracture, and family history of similar condition                                                                                           | N/A (This is a multilocus phenotype; see <a href="#">Table S1</a> for a full list of variants in this individual.) |
| 17-3406     | <i>TOP3A</i>             | GenBank: NM_004618.4:c.2272_2273insC:p.Arg758T hrfsTer3        | Hom | PMID: 30193137 | Bloom-like phenotype                                     | Short stature and microcephaly                                                                                                                                              | Similar                                                                                                            |
| 17-3847     | <i>TRAPPC6B</i>          | GenBank: NM_001079537.2:c.268-2_268-1delAG:                    | Hom | PMID: 28626029 | Microcephaly, epilepsy, and autistic features            | Failure to thrive, microcephaly, GDD, and ASD                                                                                                                               | Similar                                                                                                            |
| 17-0626     | <i>TRAPPC6B</i>          | GenBank: NM_177452.3:c.302delG:p.Gly101AlafsTer7               | Hom | PMID: 28397838 | Intellectual disability                                  | GDD and microcephaly                                                                                                                                                        | Phenotypic expansion                                                                                               |
| REQ 18-2590 | <i>TSPYL1</i>            | GenBank: NM_003309.3:c.725_                                    | Hom | PMID: 15273283 | Sudden infant death with dysgenesis of                   | IUGR, swallowing difficulty, failure to thrive, ambiguous genitalia, history of SIDS in a sister at age 6 months                                                            | Similar                                                                                                            |

|         |               |                                                |                |                |                                                                            |                                                                                                                                                                                                                           |
|---------|---------------|------------------------------------------------|----------------|----------------|----------------------------------------------------------------------------|---------------------------------------------------------------------------------------------------------------------------------------------------------------------------------------------------------------------------|
|         |               | 726delTG:p.Val242GluTer52                      |                |                | the testes syndrome                                                        |                                                                                                                                                                                                                           |
| 17-3311 | <i>UNC13A</i> | GenBank: NM_001080421.2:c.4379C>T:p.Ala1460Val | <i>De novo</i> | PMID: 28192369 | Dyskinetic movement disorder, developmental delay, and ASD                 | Failure to thrive, microcephaly, fine motor delay, gross motor delay, intellectual disability, learning disability, developmental regression, cerebral atrophy, and spasticity<br>Similar                                 |
| 17-7243 | <i>VWA3B</i>  | GenBank: NM_144992.4:c.1191T>G:p.Tyr397Ter     | Hom            | PMID: 26157035 | Cerebellar ataxia with intellectual disability                             | GDD, spastic quadriplegia, microcephaly, epilepsy, dysmorphic features, and swallowing difficulty; status post-GT-insertion: significant cerebral volume loss but no clear cerebellar involvement<br>Phenotypic expansion |
| 17-7303 | <i>WDFY3</i>  | GenBank: NM_014991.4:c.10147+2T>C:             | Het            | PMID: 27008544 | Microcephaly 18, primary, autosomal-dominant                               | Microcephalic failure to thrive, speech delay, bitemporal narrowing, a long philtrum, epicanthal folds, hypertelorism, gastrointestinal reflux, and eventration of diaphragm<br>Similar                                   |
| 17-3151 | <i>ZBTB11</i> | GenBank: NM_014415.3:c.2735G>A:p.Arg912Gln     | Hom            | PMID: 29893856 | Intellectual disability, motor delay, microcephaly, and cerebellar atrophy | GDD, microcephaly, cataract mild cerebellar atrophy, and elevated methylmalonic acid<br>Phenotypic expansion                                                                                                              |

Question marks denote uncertainty of the clinical feature of diagnosis as provided by the ordering physician. Abbreviations are as follows: Hom = homozygous; Het = heterozygous; Hemi = hemizygous; IUGR = intrauterine growth restriction; MRI = magnetic resonance imaging; GDD = global developmental delay; ASD = autism spectrum disorder; NSID = nonspecified intellectual disability; HELIX = hypohidrosis, electrolyte imbalance, lacrimal gland dysfunction, ichthyosis, and xerostomia; PMLD = Pelizaeus-Merzbacher-like disease; OFD = oral-facial-digital syndrome; SCID = severe combined immunodeficiency, SIDS = sudden infant death syndrome; and GT = gastronomy tube.

<sup>a</sup>Het (both parents) infers recessive inheritance of the phenotype associated with neonatal deaths in this instance

Table S8.<sup>a</sup> List of Couples Who Presented for Counseling with No Available DNA From the Affected Deceased Child(ren) or Fetus(es)

| ID         | Phenotype of the Deceased Child or Fetus                                                                                                                       | Result                          | Gene            | Variant(s)                                                                                                             | Zygoty             | LOF |
|------------|----------------------------------------------------------------------------------------------------------------------------------------------------------------|---------------------------------|-----------------|------------------------------------------------------------------------------------------------------------------------|--------------------|-----|
| 16-2873-A  | Previous termination because of holoprosencephaly, cyclops, cleft lip, ventricular septal defect, agenesis of the corpus callosum, club foot, and a sandal gap | Ambiguous (VUS)                 | <i>ABI2</i>     | GenBank: NM_005759.5:c.991+6T>A                                                                                        | Het (both parents) | –   |
| 17-3580-A  | History of a fetus with abnormal skeletal features                                                                                                             | Pathogenic or likely pathogenic | <i>ALPL</i>     | GenBank: NM_001177520.2:c.1195G>A:p.Glu399Lys                                                                          | Het (both parents) | –   |
| 17-6127-A  | A deceased child with hepatomegaly and suspected metabolic disease                                                                                             | Pathogenic or likely pathogenic | <i>ASL</i>      | GenBank: NM_001024944.1:c.1000C>T:p.Gln334Ter                                                                          | Het (both parents) | y   |
| 17-4404    | Neonatal death with hyperammonemia                                                                                                                             | Pathogenic or likely pathogenic | <i>ASL</i>      | GenBank: NM_001024946.1:c.525-83_528del                                                                                | Het (both parents) | –   |
| 17-7724-B  | Two deceased children with Canavan disease                                                                                                                     | Pathogenic or likely pathogenic | <i>ASPA</i>     | GenBank: NM_000049.2:c.691_692insC:p.Tyr231SerfsTer5                                                                   | Het (both parents) | y   |
| 17-0706    | Severe microcephaly                                                                                                                                            | Pathogenic or likely pathogenic | <i>ASPM</i>     | GenBank: NM_001206846.1:c.1138C>T:p.Gln380Ter in the mother; GenBank: NM_018136.5:c.4363G>T:p.Glu1455Ter in the father | Het (both parents) | y   |
| 17-2597    | A deceased child with suspected Walker-Warburg syndrome                                                                                                        | Pathogenic or likely pathogenic | <i>B3GALNT2</i> | GenBank: NM_152490.4:c.762+1G>C                                                                                        | Het (both parents) | y   |
| 17-2597    | A deceased child with Walker-Warburg Syndrome.                                                                                                                 | Pathogenic or likely pathogenic | <i>B3GALNT2</i> | GenBank: NM_152490.4:c.762+1G>C                                                                                        | Het (both parents) | y   |
| 17-5685    | IUFD                                                                                                                                                           | Pathogenic or likely pathogenic | <i>BINI</i>     | GenBank: NM_004305.3:c.3G>T:p.?                                                                                        | Het (both parents) | y   |
| 17-1488    | Two neonatal deaths with skeletal dysplasia                                                                                                                    | Pathogenic or likely pathogenic | <i>CANT1</i>    | GenBank: NM_138793.3:c.902_906dup:p.Ser303Alafs*21                                                                     | Het (both parents) | y   |
| 18-2336    | Two deceased children with polycystic kidney disease and hydrocephalus                                                                                         | Pathogenic or likely pathogenic | <i>CC2D2A</i>   | GenBank: NM_001080522.2:c.3084delG;p.Lys1029ArgfsTer3                                                                  | Het (both parents) | –   |
| REQ18-0971 | History of a pregnancy with suspected Meckel-Gruber syndrome (encephalocele, dysplastic kidney, and no polydactyly)                                            | Ambiguous (candidate gene)      | <i>CEP295</i>   | GenBank: NM_033395.1:c.2603delA;p.Gln868ArgfsTer25                                                                     | Het (both parents) | –   |

|            |                                                                                                                                             |                                 |                |                                                                           |                    |   |
|------------|---------------------------------------------------------------------------------------------------------------------------------------------|---------------------------------|----------------|---------------------------------------------------------------------------|--------------------|---|
| 18-0831    | A deceased child with developmental delay, speech delay, encephalopathy, delayed milestone, and provisional hypoxic ischemic encephalopathy | Ambiguous (VUS)                 | <i>COG4</i>    | GenBank: NM_001195139.1:c.1721C>T:p.Ser574Phe                             | Het (both parents) | – |
| REQ18-2856 | Three deceased children with severe hyperammonemia                                                                                          | Pathogenic or likely pathogenic | <i>CPS1</i>    | GenBank: NM_001122634.3:c.406C>T:p.Arg136Cys                              | Het (both parents) | – |
| 17-5536    | Multiple neonatal deaths                                                                                                                    | Ambiguous (VUS)                 | <i>CPT2</i>    | GenBank: NM_000098.2:c.451C>G:p.Arg151Gly                                 | Het (both parents) | – |
| 18-0769    | Recurrent non-immune hydrops fetalis                                                                                                        | Ambiguous (VUS)                 | <i>DYNC2HI</i> | GenBank: NM_001080463.1:c.3331G>A:p.Glu1111Lys                            | Het (both parents) | – |
| 17-7307    | A deceased child with severe acidosis and hydrocephalus                                                                                     | Pathogenic or likely pathogenic | <i>ECHS1</i>   | GenBank: NM_004092.3:c.88+5G>A                                            | Het (both parents) | – |
| 17-2653    | A deceased child with hydrocephalous, congenital heart disease, and multiple congenital abnormalities                                       | Ambiguous (candidate gene)      | <i>EHBP1LI</i> | GenBank: NM_001099409.2:c.4004-1G>A                                       | Het (both parents) | y |
| 17-3181    | Four deceased children with hydrocephalus                                                                                                   | Ambiguous (VUS)                 | <i>EML1</i>    | GenBank: NM_004434.2:c.2233G>A:p.Val745Ile                                | Het (both parents) | – |
| 17-4767    | A deceased child with ataxia and spasticity                                                                                                 | Pathogenic or likely pathogenic | <i>FAM134B</i> | GenBank: NM_019000.4:c.503C>G:p.Ser168Ter                                 | Het (both parents) | – |
| 17-0249    | History of fetal loss with arrhythmia, club foot, short limbs, hydrocephalus, encephalocele, and polyhydramnios                             | Ambiguous (candidate gene)      | <i>NCOR2</i>   | GenBank: NM_001077261.4:c.2275G>A:(p.Gly759Arg)                           | Het (both parents) | – |
| 17-4496    | Five deceased children with unexplained lactic acidosis                                                                                     | Pathogenic or likely pathogenic | <i>FBXL4</i>   | GenBank: NM_012160.4:c.1652T>A:p.Ile551Asn                                | Het (carrier)      | – |
| 17-2289    | A deceased child with suspected Walker-Warburg syndrome                                                                                     | Pathogenic or likely pathogenic | <i>FKRP</i>    | GenBank: NM_001039885.2:c.954_955insTGCGCGCGC:p.Cys318_Leu319insCysAlaArg | Het (both parents) | y |
| REQ18-2239 | Two deceased children with Pompe disease                                                                                                    | Pathogenic or likely pathogenic | <i>GAA</i>     | GenBank: NM_000152.4:c.1802C>T:p.Ser601Leu                                | Het (both parents) | – |
| 17-6039    | Three deceased children with suspected muscle disease                                                                                       | Pathogenic or likely pathogenic | <i>GFPT1</i>   | GenBank: NM_001244710.1:c.686-1G>A                                        | Het (both parents) | y |
| 17-1160    | Parents of four children who died as neonates with a suspected metabolic disease                                                            | Pathogenic or likely pathogenic | <i>HADHB</i>   | GenBank: NM_000183.3:c.631-1G>A                                           | Het (both parents) | – |

|         |                                                                                                                                                                                             |                                         |                            |                                                                   |                    |   |
|---------|---------------------------------------------------------------------------------------------------------------------------------------------------------------------------------------------|-----------------------------------------|----------------------------|-------------------------------------------------------------------|--------------------|---|
| 18-0957 | Two deceased children with beta thalassemia major                                                                                                                                           | Pathogenic or likely pathogenic         | <i>HBB</i>                 | GenBank: NM_000518.5:c.135delC:p.Phe46LeufsTer16                  | Het (both parents) | – |
| 17-4868 | History of one deceased child with sickle cell anemia and another with severe microcephaly                                                                                                  | Pathogenic or likely pathogenic         | <i>HBB</i> and <i>NDE1</i> | GenBank: NM_000518.5:c.315+1G>A; NM_017668.3:c.346G>T:p.Glu116Ter | Het (both parents) | y |
| 17-1801 | Ptosis and subclinical epilepsy (EEG)                                                                                                                                                       | Ambiguous (VUS)                         | <i>IARS</i>                | GenBank: NM_002161.5:c.1114-3T>C                                  | Het (both parents) | – |
| 18-1907 | A deceased child with suspected Donohue syndrome                                                                                                                                            | Pathogenic or likely pathogenic         | <i>INSR</i>                | GenBank: NM_000208.2:c.1546T>C:p.Trp516Arg                        | Het (both parents) | – |
| 17-4689 | Two deceased babies with hydrocephalus and renal anomalies                                                                                                                                  | Pathogenic or likely pathogenic         | <i>ISPD</i>                | GenBank: NM_001101417.3:c.1036G>T:p.Glu346Ter                     | Het (both parents) | – |
| 18-2004 | Two pregnancy losses                                                                                                                                                                        | Pathogenic or likely pathogenic         | <i>KIAA0586</i>            | GenBank: NM_001244193.1:c.3468_3469insT:p.Ile1157TyfsTer2         | Het (both parents) | – |
| 17-6683 | A deceased child with dystrophic epidermolysis bullosa                                                                                                                                      | Pathogenic or likely pathogenic and VUS | <i>LAMA3</i>               | GenBank: NM_198129.2:c.5304-19C>G; NM_198129.2:c.8436+1G>A        | Het (CMP)          | y |
| 17-3772 | One deceased baby with epidermolysis bullosa                                                                                                                                                | Pathogenic or likely pathogenic         | <i>LAMC2</i>               | GenBank: NM_005562.2:c.3385C>T:p.Arg1129Ter                       | Het (both parents) | y |
| 17-2109 | Previous pregnancies with multiple anomalies                                                                                                                                                | Pathogenic or likely pathogenic         | <i>LGI4</i>                | GenBank: NM_139284.2:c.834delG:p.Ser279AlafsTer191                | Het (both parents) | y |
| 17-2133 | Two deceased children with polycystic kidney disease                                                                                                                                        | Ambiguous (VUS)                         | <i>MAPKBP1</i>             | GenBank: NM_001265611.1:c.3304C>T:p.Arg1102Cys                    | Het (both parents) | – |
| 17-0367 | Two neonatal deaths with undiagnosed severe neuromuscular disease                                                                                                                           | Ambiguous (candidate gene)              | <i>MFN1</i>                | GenBank: NM_033540.2:c.2012+8G>A:                                 | Het (both parents) | – |
| 17-3770 | Two deceased newborns with facial anomalies (bilateral, large soft tissue lesions, absent nasal soft tissue, and internal tubular sonolucent structures over both eyes), and clenched hands | Ambiguous (candidate gene)              | <i>MICAL3</i>              | GenBank: NM_001136004.3:c.2398-3T>A                               | Het (both parents) | – |
| 17-2096 | Three affected pregnancies with hydrocephalus                                                                                                                                               | Pathogenic or likely pathogenic         | <i>MMACHC</i>              | GenBank: NM_015506.2:c.848G>C:p.Ter283Serext*14                   | Het (both parents) | y |

|           |                                                                                                                                                                                                                                                                                                                   |                                 |                |                                                            |                    |   |
|-----------|-------------------------------------------------------------------------------------------------------------------------------------------------------------------------------------------------------------------------------------------------------------------------------------------------------------------|---------------------------------|----------------|------------------------------------------------------------|--------------------|---|
| 17-5990-A | Two deceased children with cardiomyopathy, failure to thrive, growth retardation, fine and gross motor delay, speech delay, intellectual disability, learning disability, external ear malformation, recurrent fever, anemia, immunodeficiency, hypotonia, muscle weakness, renal agenesis, and renal tubulopathy | Pathogenic or likely pathogenic | <i>MTHF D1</i> | GenBank: NM_005956.4:c.517C>T :p.Arg173Cys                 | Het (carrier)      | - |
| 18-0664   | Three neonatal deaths with unexplained severe lactic acidosis                                                                                                                                                                                                                                                     | Pathogenic or likely pathogenic | <i>NDUFS 6</i> | GenBank: NM_004553.4:c.187-1G>A                            | Het (both parents) | y |
| 17-3566   | Two neonatal deaths with myopathy, arthrogryposis, and dysmorphism                                                                                                                                                                                                                                                | Ambiguous (VUS)                 | <i>NEB</i>     | GenBank: NM_004543.4:c.18696+20A>G                         | Het (both parents) | - |
| 17-5341   | Two deceased children with severe hypotonia                                                                                                                                                                                                                                                                       | Ambiguous (VUS)                 | <i>NEB</i>     | GenBank: NM_004543.3:c.17394T>A:p.Asn5798LysAsn5798Lys     | Het (carrier)      | - |
| 17-3501   | Recurrent non-immune hydrops fetalis                                                                                                                                                                                                                                                                              | Pathogenic or likely pathogenic | <i>NEB</i>     | GenBank: NM_004543.3:c.15873de1A:p.Val5292Serfs*8          | Het (both parents) | y |
| 18-1212   | Two deceased children with multiple congenital anomalies                                                                                                                                                                                                                                                          | Pathogenic or likely pathogenic | <i>NEK1</i>    | GenBank: NM_001199399.1:c.3527T>A:p.Leu1176Ter             | Het (both parents) | y |
| 17-2362   | Two IUFDs with congenital anomalies                                                                                                                                                                                                                                                                               | Ambiguous (VUS)                 | <i>NEK9</i>    | GenBank: NM_033116.5:c.2525C>T:p.Thr842Ile                 | Het                | - |
| 17-4002   | Two IUFDs                                                                                                                                                                                                                                                                                                         | Pathogenic or likely pathogenic | <i>NOD2</i>    | GenBank: NM_001293557.1:c.1828_1846del:p.Asn610SerfsTer120 | Het (both parents) | y |
| 17-6935   | Two neonatal deaths with renal agenesis and polydactyly                                                                                                                                                                                                                                                           | Pathogenic or likely pathogenic | <i>NPHP3</i>   | GenBank: NM_153240.5:c.2694-2_2694-1delAG                  | Het (both parents) | y |
| 17-6614   | Two deceased neonates with polycystic kidney disease and one with anencephaly                                                                                                                                                                                                                                     | Pathogenic or likely pathogenic | <i>NPHP3</i>   | GenBank: NM_153240.5:c.2694-2_2694-1delAG                  | Het (both parents) | - |
| 18-2124   | Static encephalopathy                                                                                                                                                                                                                                                                                             | Ambiguous (VUS)                 | <i>PCCA</i>    | GenBank: NM_001127692.2:c.323C>A:p.Thr108Asn               | Het (both parents) | - |
| 17-0456   | Three children with Zellweger syndrome                                                                                                                                                                                                                                                                            | Pathogenic or likely pathogenic | <i>PEX5</i>    | GenBank: NM_000319.4:c.1554T>G:p.Asn518Lys                 | Het (both parents) | - |
| 17-4845   | Three neonatal deaths with hydrocephalus, microcephaly, and cerebellum hypoplasia                                                                                                                                                                                                                                 | Ambiguous (VUS)                 | <i>PIGN</i>    | GenBank: NM_012327.5:c.305T>C :p.Ile102Thr                 | Het (both parents) | - |

|           |                                                                                                      |                                 |                 |                                                           |                    |   |
|-----------|------------------------------------------------------------------------------------------------------|---------------------------------|-----------------|-----------------------------------------------------------|--------------------|---|
| 17-6313   | Three deceased children with suspected polycystic kidney disease                                     | Pathogenic or likely pathogenic | <i>PKHD1</i>    | GenBank: NM_138694.3:c.4325_4326insTT:p.Cys1443SerfsTer18 | Het (both parents) | y |
| 17-3043   | Three deceased children with congenital hydrocephalus                                                | Pathogenic or likely pathogenic | <i>POMGNT2</i>  | GenBank: NM_032806.5:c.473G>A:p.Arg158His                 | Het (both parents) | - |
| 17-7704   | Three deceased babies born with hydrocephalus                                                        | Pathogenic or likely pathogenic | <i>POMT1</i>    | GenBank: NM_001077366.1:c.118+1G>T                        | Het (both parents) | - |
| 17-5785-A | A deceased child with suspected Griscelli syndrome                                                   | Pathogenic or likely pathogenic | <i>RAB27A</i>   | GenBank: NM_004580.4:c.598C>T:p.Arg200Ter                 | Het (both parents) | y |
| 17-3004   | Microcephaly, GDD, epilepsy, spasticity, and brain atrophy                                           | Pathogenic or likely pathogenic | <i>RFT1</i>     | GenBank: NM_052859.4:c.775+1G>C                           | Het (both parents) | y |
| 17-7694   | Two deceased infants with brain atrophy                                                              | Ambiguous (VUS)                 | <i>SCO1</i>     | GenBank: NM_004589.3:c.722A>G:p.Tyr241Cys                 | Het (both parents) | - |
| 18-0170   | Three deceased children with epilepsy and failure to thrive                                          | Ambiguous (VUS)                 | <i>SLC15A5</i>  | GenBank: NM_001170798.1:c.1593-6delCTTT                   | Het (both parents) | - |
| 17-5514   | Two deceased children with two different diseases: non-immune hydrops fetalis and nephrocalcinosis   | Pathogenic or likely pathogenic | <i>SLC34A1</i>  | GenBank: NM_003052.4:c.532+2T>C                           | Het (both parents) | y |
| 17-1563   | Four neonatal deaths with multiple anomalies                                                         | Pathogenic or likely pathogenic | <i>SMARCALI</i> | GenBank: NM_001127207.1:c.445C>T:p.Gln149Ter              | Het (both parents) | y |
| 17-6346   | A deceased neonate with history of non-immune hydrops fetalis                                        | Pathogenic or likely pathogenic | <i>THSD1</i>    | GenBank: NM_018676.3:c.617G>A:p.Cys206Tyr                 | Het (both parents) | - |
| 17-1407   | Three neonatal deaths with history of polyhydramnios and imperforate anus                            | Pathogenic or likely pathogenic | <i>TTC7A</i>    | GenBank: NM_001288951.1:c.412C>T:p.Arg138Ter              | Het (both parents) | y |
| 17-8378   | A deceased child with hydrocephalus                                                                  | Pathogenic or likely pathogenic | <i>WDR81</i>    | GenBank: NM_001163809.1:c.850_851delCT:p.Leu284ValfsTer9  | Het (both parents) | - |
| 17-0374   | History of a deceased child (1 year old) with club feet, clinodactyly, a small mouth, and small feet | Ambiguous (candidate gene)      | <i>XIRP2</i>    | GenBank: NM_001199144.1:c.2419T>A:p.Phe807Ile             | Het (both parents) | - |
| 18-2659   | IUFD with severe IUGR                                                                                | Ambiguous (candidate gene)      | <i>ZMIZ2</i>    | GenBank: NM_174929.2:c.1270C>T:p.Gln424Ter                | Het (both parents) | y |

Abbreviations are as follows: LOF = loss of function, y = yes, Hom = homozygous, Het = heterozygous, Hemi = hemizygous, GDD = global developmental delay, IUGR = intrauterine growth restriction, IUFD = intrauterine fetal death, VUS = variant of unknown significance, EEG = electroencephalogram, and CMP = compound.

<sup>a</sup>Negative instances can be found in [Table S9](#).

Table S10.<sup>a</sup> List of Individuals for Whom Flash WES Protocol was Implemented

| ID         | Result                          | Gene                              | Variant(s)                                                                       | Zygoty           | Phenotype                                                                                                                        |
|------------|---------------------------------|-----------------------------------|----------------------------------------------------------------------------------|------------------|----------------------------------------------------------------------------------------------------------------------------------|
| REQ18-1702 | Pathogenic or likely pathogenic | <i>ABCA3</i>                      | GenBank:<br>NM_001089.3:c.3145<br>T>C:p.Ser1049Pro                               | Hom              | NICU individual with severe unexplained lung disease                                                                             |
| 18-2213    | Negative                        |                                   |                                                                                  |                  | Individual with electrolyte imbalance and suspected renal dysfunction                                                            |
| REQ18-3252 | Ambiguous (VUS)                 | <i>AKR1D1</i>                     | GenBank:<br>NM_001190906.1:c.81<br>7T>C:p.Trp273Arg                              | Hom              | Individual with liver failure; a candidate for liver transplant                                                                  |
| REQ18-1700 | Pathogenic or likely pathogenic | <i>BAAT</i>                       | GenBank:<br>NM_001127610.1:c.2<br>T>A:p.?                                        | Hom              | Individual with cholestatic liver disease; a candidate for liver transplant                                                      |
| 18-1297-B  | Pathogenic or likely pathogenic | <i>CFTR</i>                       | GenBank:<br>NM_000492.3:c.579+1<br>G>A                                           | Hom              | NICU individual with unexplained severe lung and liver disease                                                                   |
| REQ18-2160 | Pathogenic or likely pathogenic | <i>CLCNKB</i>                     | GenBank:<br>NM_001165945.2:c.90<br>1G>C:p.Gly301Arg                              | Hom              | Individual with recurrent vomiting, growth retardation and/or short stature, renal tubulopathy, and a history of polyhydramnios  |
| REQ18-1192 | Pathogenic or likely pathogenic | <i>CYBB</i><br>and<br><i>G6PD</i> | GenBank:<br>NM_000397.3:c.1462-<br>1G>C;<br>NM_000402.4:c.233T<br>>C:p.Ile78Thr; | Hom and<br>Hemi  | An individual with G6PD, suspected to have CGD (chronic granulomatous disease); a candidate for bone marrow transplant           |
| 18-0842-B  | Pathogenic or likely pathogenic | <i>OTC</i>                        | GenBank:<br>NM_000531.5:c.231G<br>>T:p.Leu77Phe                                  | Het              | Pregnant mother with history of a deceased neonate with hyperammonemia                                                           |
| REQ18-1996 | Pathogenic or likely pathogenic | <i>DGUOK</i>                      | GenBank:<br>NM_001318859.1:c.47<br>8_479insTGAT:p.Asp<br>160ValfsTer3            | Hom              | Individual with liver failure and developmental delay; a candidate for liver transplant                                          |
| REQ18-3659 | Pathogenic or likely pathogenic | <i>DGUOK</i>                      | GenBank:<br>NM_001318859.1:c.47<br>8_479insTGAT:p.Asp<br>160ValfsTer3            | Hom              | Individual with failure to thrive, microcephaly, developmental delay, and abnormal hair                                          |
| REQ18-4214 | Pathogenic or likely pathogenic | <i>ECHS1</i>                      | GenBank:<br>NM_004092.3:c.88+5<br>G>A                                            | Het<br>(carrier) | Pregnant mother with history of a deceased neonate                                                                               |
| 18-2455    | Ambiguous (candidate gene)      | <i>EIF6</i>                       | GenBank:<br>NM_181466.2:c.132C<br>>G:p.Tyr44Ter                                  | Hom              | Individual with cholestatic jaundice, developmental delay, and dysmorphic features; a potential candidate for liver transplant   |
| REQ18-3341 | Pathogenic or likely pathogenic | <i>FBXL4</i>                      | GenBank:<br>NM_012160.4:c.1698<br>A>G:p.Ile566Met                                | Hom              | One of two children with unexplained lactic acidosis; there is an urgent need for molecular diagnosis because of pregnant mother |

|            |                                                                |                              |                                                                                                         |             |                                                                                                                                                                                                                                                                                      |
|------------|----------------------------------------------------------------|------------------------------|---------------------------------------------------------------------------------------------------------|-------------|--------------------------------------------------------------------------------------------------------------------------------------------------------------------------------------------------------------------------------------------------------------------------------------|
| REQ18-3794 | Negative                                                       |                              | .                                                                                                       |             | NICU individual with autoimmune hemolytic anemia, thrombocytopenia, hepatosplenomegaly, and severe hypotonia                                                                                                                                                                         |
| REQ18-2014 | Pathogenic or likely pathogenic                                | <i>GLDC</i>                  | Chr9:g.(6610356-1_6620184+1)_ (6645692-1_6720863+1)_del                                                 | Hom         | NICU individual with nonketotic hyperglycinemia                                                                                                                                                                                                                                      |
| REQ18-0631 | Pathogenic or likely pathogenic and ambiguous (candidate gene) | <i>HBB</i> and <i>CFAP46</i> | GenBank:<br>NM_001200049.3:c.7502-4G>A;<br>NM_000518.5:c.20A>T:p.Glu7Val;<br>NM_001200049.3:c.7502-4G>A | Hom and Hom | Individual with normal GGT cholestasis                                                                                                                                                                                                                                               |
| 18-0816-b  | Ambiguous (VUS)                                                | <i>LIG1</i>                  | GenBank:<br>NM_001289064.1:c.1666G>A:p.Ala556Thr                                                        | Hom         | SCID features; a potential candidate for bone marrow transplant                                                                                                                                                                                                                      |
| REQ18-4236 | Ambiguous (candidate gene)                                     | <i>LTBP1</i>                 | GenBank:<br>NM_000627.3:c.364C>T:p.Gln122Ter                                                            | Hom         | Individual with dysmorphic features                                                                                                                                                                                                                                                  |
| REQ18-2652 | Pathogenic or likely pathogenic                                | <i>MARS</i>                  | GenBank:<br>NM_004990.4:c.1066C>T:p.Arg356Cys                                                           | Hom         | NICU individual with anemia and/or neutropenia and/or pancytopenia, IUGR, elevated transaminases, cardiomyopathy, failure to thrive, and polyhydramnios                                                                                                                              |
| REQ18-1271 | Pathogenic or likely pathogenic                                | <i>MPVI7</i>                 | GenBank:<br>NM_002437.4:c.279+1G>T                                                                      | Hom         | Individual with microcephaly, IUGR, elevated transaminases, and failure to thrive                                                                                                                                                                                                    |
| 18-2765    | Ambiguous (candidate gene)                                     | <i>NAIP</i>                  | GenBank:<br>NM_004536.2:c.602G>C:p.Gly201Ala                                                            | Hom         | Cyclic neutropenia, arthritis, ?IBD, and suspected SCID; a candidate for bone marrow transplant                                                                                                                                                                                      |
| REQ18-4855 | Pathogenic or likely pathogenic                                | <i>NPCI</i>                  | GenBank:<br>NM_000271.4:c.2114T>C:p.Leu705Pro                                                           | Hom         | Individual with cholestatic liver disease; a candidate for liver transplant                                                                                                                                                                                                          |
| 18-1824-B  | Pathogenic or likely pathogenic                                | <i>PKLR</i>                  | GenBank:<br>NM_000298.6:c.1435C>T:p.Arg479Cys                                                           | Hom         | Individual with anemia and intellectual disability                                                                                                                                                                                                                                   |
| REQ18-3345 | Pathogenic or likely pathogenic                                | <i>POLG</i>                  | GenBank:<br>NM_001126131.1:c.3286C>T:p.Arg1096Cys                                                       | Hom         | Individual with liver failure and developmental delay; a candidate for liver transplant                                                                                                                                                                                              |
| 18-1257-B  | Pathogenic or likely pathogenic                                | <i>PRF1</i>                  | GenBank:<br>NM_001083116.2:c.895C>T:p.Arg299Cys                                                         | Hom         | Individual with immunodeficiency; a candidate for bone marrow transplant                                                                                                                                                                                                             |
| REQ18-1959 | Pathogenic or likely pathogenic                                | <i>PRKD1</i>                 | GenBank:<br>NM_002742.2:c.2554G>T:p.Glu852Ter                                                           | Hom         | NICU 8-week-old boy with severe, complex congenital heart disease (pulmonary atresia, ventricular septal defect, major aortopulmonary collateral artery, patent ductus arteriosus, and hypertrophic cardiomyopathy; on prostaglandin with biventricular hypertrophic cardiomyopathy) |

|            |                                 |                 |                                                             |     |                                                                                                                                                                         |
|------------|---------------------------------|-----------------|-------------------------------------------------------------|-----|-------------------------------------------------------------------------------------------------------------------------------------------------------------------------|
| REQ18-1480 | Pathogenic or likely pathogenic | <i>RAG2</i>     | GenBank:<br>NM_000536.3:c.374_375delCA:p.Thr125ArgfsTer10   | Hom | Individual with immunodeficiency; a candidate for bone marrow transplant                                                                                                |
| REQ18-0419 | Pathogenic or likely pathogenic | <i>RBCK1</i>    | GenBank:<br>NM_031229.3:c.120_121insTGCC:p.Leu41CysfsTer9   | Hom | Individual with failure to thrive, gross and fine motor delay, lactic acidemia, recurrent fever, and immunodeficiency; a potential candidate for bone marrow transplant |
| 18-0453    | Ambiguous (VUS)                 | <i>RNAS EH1</i> | GenBank:<br>NM_001286834.2:c.8A>G:p.Tyr3Cys                 | Hom | Individual with lactic acidosis                                                                                                                                         |
| 17-1684-C  | Pathogenic or likely pathogenic | <i>SLC17A5</i>  | GenBank:<br>NM_012434.4:c.308G>A:p.Trp103Ter                | Hom | NICU individual with non-immune hydrops fetalis, congenital dysmorphic features, and neonatal cholestasis                                                               |
| REQ18-4394 | Pathogenic or likely pathogenic | <i>SOS1</i>     | GenBank:<br>NM_005633.3:c.1297G>A:p.Glu433Lys               | Het | Individual with anemia and severe bone marrow dysplasia; a candidate for bone marrow transplant                                                                         |
| REQ18-2677 | Ambiguous (candidate gene)      | <i>TJPI</i>     | GenBank:<br>NM_175610.3:c.3964G>A:p.Gly1322Arg              | Het | NICU individual with lissencephaly and heterotopia                                                                                                                      |
| 18-2764    | Pathogenic or likely pathogenic | <i>TMEM231</i>  | GenBank:<br>NM_001077416.2:c.824-11T>C                      | Hom | NICU individual with polydactyly and occipital encephalocele                                                                                                            |
| REQ18-1528 | Ambiguous (candidate gene)      | <i>TOMM40</i>   | GenBank:<br>NM_001128917.1:c.275A>G:p.Glu92Gly              | Het | ICU adult with encephalopathy and a history of stroke-like episodes                                                                                                     |
| REQ18-2590 | Pathogenic or likely pathogenic | <i>TSPYL1</i>   | GenBank:<br>NM_003309.3:c.725_726delTG:p.Val242GluafsTer52  | Hom | NICU case with IUGR, ambiguous genitalia, and a history of a deceased sister with SIDS                                                                                  |
| 18-2763    | Ambiguous (VUS)                 | <i>TTC8</i>     | GenBank:<br>NM_001288782.1:c.107G>A:p.Cys36Tyr              | Hom | Individual with polydactyly and deteriorating renal function                                                                                                            |
| REQ18-2801 | Pathogenic or likely pathogenic | <i>VPS33B</i>   | GenBank:<br>NM_001289148.1:c.1438C>T:p.Arg480Ter            | Hom | Individual with microcephaly; skin, hair, and nail abnormalities; hearing loss; hypotonia; failure to thrive; and elevated transaminases                                |
| REQ18-3658 | Pathogenic or likely pathogenic | <i>ZBTB24</i>   | GenBank:<br>NM_014797.2:c.1492_1493delCA:p.Gln498ValfsTer15 | Hom | Individual with dysmorphic features and epilepsy                                                                                                                        |
| REQ18-4044 | Ambiguous (VUS)                 | <i>ZEB2</i>     | GenBank:<br>NM_001171653.1:c.1898C>T:p.Ser633Phe            | Het | Individual with Hirschsprung disease                                                                                                                                    |

|           |                 |                  |                                                    |     |                                                                                                                                                    |
|-----------|-----------------|------------------|----------------------------------------------------|-----|----------------------------------------------------------------------------------------------------------------------------------------------------|
| 18-2346-B | Ambiguous (VUS) | <i>ZFXH</i><br>4 | GenBank:<br>NM_024721.4:c.9271<br>G>A:p.Gly3091Ser | Het | NICU individual with tetralogy of Fallot, failure to thrive, developmental delay, speech delay, facial dysmorphism, and external ear malformations |
|-----------|-----------------|------------------|----------------------------------------------------|-----|----------------------------------------------------------------------------------------------------------------------------------------------------|

Question marks denote uncertainty of the clinical feature of diagnosis as provided by the ordering physician. Abbreviations are as follows: Hom = homozygous, Het = heterozygous, Hemi = hemizygous, IUGR = intrauterine growth restriction, NICU = neonatal intensive care unit, ICU = intensive care unit, SCID = severe combined immunodeficiency, IBD = inflammatory bowel disease, and SIDS = sudden infant death syndrome.

<sup>a</sup>Negative instances can be found in [Table S11](#).
